# Supplementary material
Source: PubMed Central journal article supplement (PMC8727510)

**A**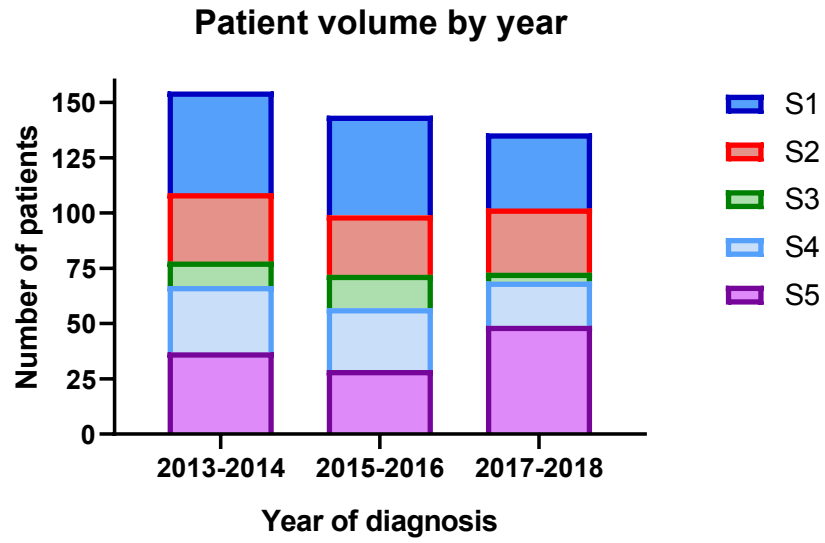**B**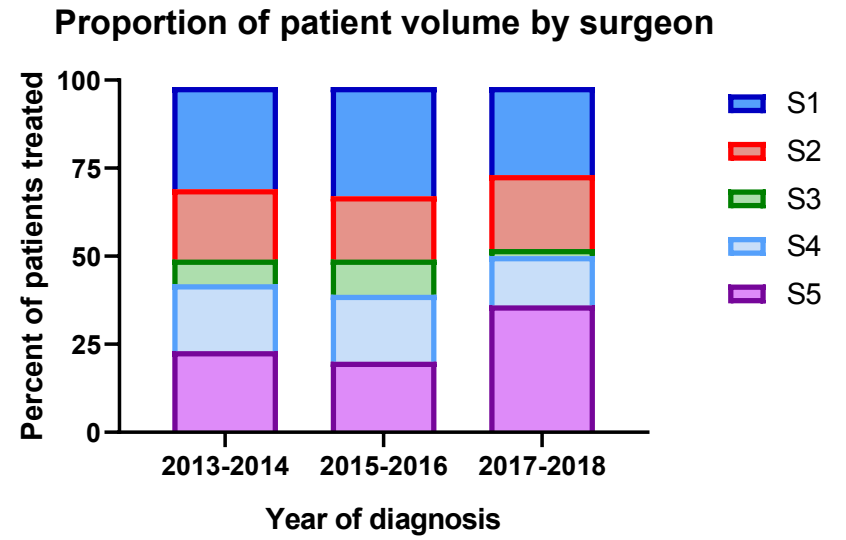**C**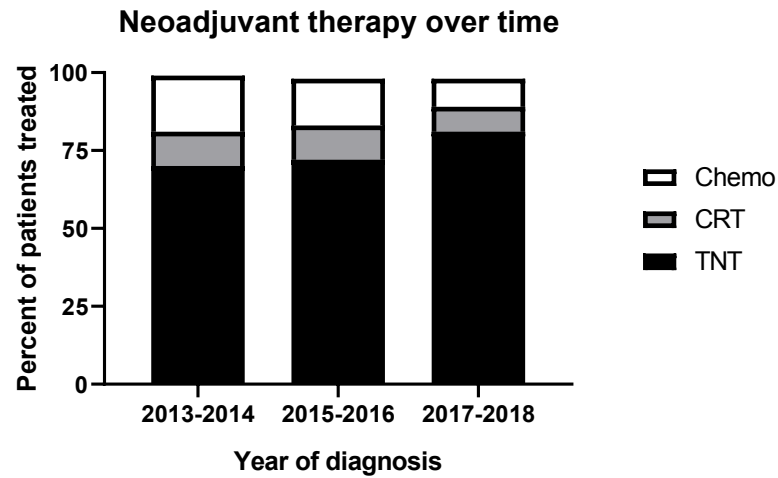**D**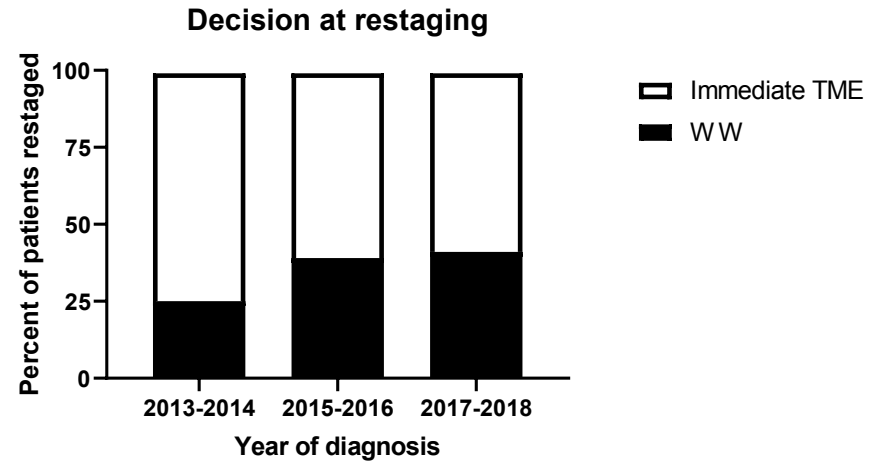

Figure S1

Supplement: NIHMS1749488-supplement-1749488_Sup_Fig.pdf [file NIHMS1749488-supplement-1749488_Sup_Fig.pdf]
